# Supplementary material for: Sharks Do Not Always Grow Slowly: Tagging Data Reveal a Different Pattern of Growth, Longevity and Maturity for Threatened Smooth-Hounds in the Central Mediterranean Sea
Source: MDPI journal article supplement (doi:10.3390/jmse10111647), 2022-11-03
Supplement: s1 [file s1]

**Sharks do not always grow slowly: tagging data reveals a different pattern of growth, longevity and maturity for threatened smooth-hounds in the central Mediterranean Sea**

Gabriele Boscolo Palo, Manfredi Di Lorenzo\* Salvatore Gancitano, Sergio Ragonese, Carlotta Mazzoldi, Francesco Colloca

\*corresponding author: manfredi.dilorenzo@libero.it

**Table S1.** Tagged individuals of *M. mustelus* since 2007 in the South of Sicily. Samples are sorted by time at liberty; information includes: tag codes; released and recapture dates; total length, and sex. The bold rows indicate individuals recaptured twice.

| Tag code (#) | Sex      | Tagging date             | Length (cm) at tagging | Recapture date           | Length (cm) at recapture | Time at liberty (days) | Growth (cm) |
|--------------|----------|--------------------------|------------------------|--------------------------|--------------------------|------------------------|-------------|
| #71          | M        | 6 June 2007              | 57                     | 19 September 2007        | 61                       | 105                    | 5           |
| #84          | M        | 29 June 2007             | 70                     | 26 February 2010         | 106                      | 973                    | 36          |
| #85          | M        | 29 June 2007             | 74                     | 30 October 2009          | 115                      | 854                    | 41          |
| #119         | F        | 25 July 2007             | 67                     | 19 September 2007        | 69                       | 56                     | 2           |
| #123         | M        | 30 July 2007             | 79                     | 20 February 2008         | 84                       | 205                    | 5           |
| #151         | M        | 18 September 2007        | 77                     | 2 October 2007           | 78                       | 14                     | 1           |
| #153         | M        | 15 September 2007        | 75                     | 24 October 2007          | 77                       | 39                     | 2           |
| <b>#161</b>  | <b>M</b> | <b>15 September 2007</b> | <b>58</b>              | <b>12 September 2008</b> | <b>73</b>                | <b>363</b>             | <b>15</b>   |
| <b>#161</b>  | <b>M</b> | <b>15 September 2007</b> | <b>58</b>              | <b>14 April 2008</b>     | <b>66</b>                | <b>212</b>             | <b>8</b>    |
| <b>#161</b>  | <b>M</b> | <b>14 April 2008</b>     | <b>66</b>              | <b>12 September 2008</b> | <b>73</b>                | <b>151</b>             | <b>7</b>    |
| <b>#162</b>  | <b>M</b> | <b>15 September 2007</b> | <b>55</b>              | <b>18 June 2010</b>      | <b>100</b>               | <b>1007</b>            | <b>45</b>   |
| <b>#162</b>  | <b>M</b> | <b>15 September 2007</b> | <b>55</b>              | <b>25 September 2008</b> | <b>72</b>                | <b>376</b>             | <b>17</b>   |
| <b>#162</b>  | <b>M</b> | <b>25 September 2008</b> | <b>72</b>              | <b>18 June 2010</b>      | <b>100</b>               | <b>631</b>             | <b>28</b>   |
| #163         | M        | 15 September 2007        | 80                     | 24 July 2010             | 105                      | 678                    | 25          |
| #167         | M        | 15 September 2007        | 82                     | 18 June 2010             | 125                      | 1007                   | 43          |
| #176         | F        | 23 September 2007        | 95                     | 29 March 2008            | 102                      | 188                    | 7           |
| #181         | M        | 23 September 2007        | 69                     | 14 October 2007          | 69                       | 21                     | 0           |
| #183         | M        | 23 September 2007        | 69                     | 7 June 2009              | 91                       | 621                    | 22          |
| <b>#200</b>  | <b>F</b> | <b>6 October 2007</b>    | <b>80</b>              | <b>13 June 2008</b>      | <b>85</b>                | <b>251</b>             | <b>5</b>    |
| <b>#200</b>  | <b>F</b> | <b>6 October 2007</b>    | <b>80</b>              | <b>19 October 2007</b>   | <b>80</b>                | <b>13</b>              | <b>0</b>    |
| <b>#200</b>  | <b>F</b> | <b>19 October 2007</b>   | <b>80</b>              | <b>13 June 2008</b>      | <b>85</b>                | <b>238</b>             | <b>5</b>    |
| #221         | M        | 15 October 2007          | 70                     | 18 August 2008           | 83                       | 308                    | 13          |
| #227         | F        | 23 October 2007          | 75                     | 19 November 2007         | 77                       | 27                     | 2           |
| #242         | F        | 28 October 2007          | 88                     | 29 October 2007          | 88                       | 1                      | 0           |
| #323         | M        | 25 April 2007            | 71                     | 10 April 2010            | 100                      | 722                    | 29          |
| #328         | F        | 19 May 2008              | 75                     | 12 September 2008        | 83                       | 116                    | 8           |

|      |   |                |    |                   |    |     |    |
|------|---|----------------|----|-------------------|----|-----|----|
| #348 | F | 30 August 2008 | 78 | 7 April 2009      | 95 | 221 | 17 |
| #376 | F | 3 October 2008 | 70 | 13 March 2009     | 77 | 161 | 7  |
| #405 | M | 3 January 2009 | 63 | 2 March 2009      | 65 | 57  | 2  |
| #466 | F | 17 July 2009   | 70 | 20 September 2009 | 75 | 65  | 5  |
| #445 | F | 9 June 2009    | 81 | 1 October 2009    | 89 | 114 | 8  |
| #489 | F | 1 January 2010 | 68 | 28 April 2010     | 73 | 115 | 5  |

**Table S2. Comparison of annual growth estimates (cm) obtained from vertebrae of *M. mustelus* and tagged individuals of *Mustelus spp.*. Data are listed for different size classes. SD= Standard deviation**

|                         | Method                | Size (cm) <i>M. mustelus</i> |           |          |          |
|-------------------------|-----------------------|------------------------------|-----------|----------|----------|
|                         |                       | 40-80                        | 80-100    | 100-120  | 120-180  |
| Number of samples       | Tagging data          | 6                            | 7         | 5        | 1        |
|                         | back-calculation data | 22                           | 25        | 10       | 39       |
| Annual growth (mean±SD) | Tagging data          | 15.47±1.3                    | 17.69±4.5 | 14.9±1.5 | 15.41    |
|                         | back-calculation data | 13.66±1.5                    | 12.8±2.5  | 13.5±0.9 | 11.9±4.2 |

**Table S3. Mean back-calculated length-at-age (cm) for combined sexes of *M. mustelus* and *M. punctulatus*. SD= Standard deviation**

***M. mustelus***

| Age  | Number | Age group (year) |      |      |       |       |     |       |     |       |     |       |     |       |     |       |
|------|--------|------------------|------|------|-------|-------|-----|-------|-----|-------|-----|-------|-----|-------|-----|-------|
|      |        | 1                | 2    | 3    | 4     | 5     | 6   | 7     | 8   | 9     | 10  | 11    | 12  | 13    | 14  | 15    |
| 1    | 13     |                  |      |      |       |       |     |       |     |       |     |       |     |       |     |       |
| 2    | 14     | 71               |      |      |       |       |     |       |     |       |     |       |     |       |     |       |
| 3    | 19     | 69.5             | 81.5 |      |       |       |     |       |     |       |     |       |     |       |     |       |
| 4    | 7      | 71               | 84   | 96   |       |       |     |       |     |       |     |       |     |       |     |       |
| 5    | 4      | 69               | 82   | 96   | 108.5 |       |     |       |     |       |     |       |     |       |     |       |
| 6    | 2      | 71               | 84   | 95   | 108   | 119   |     |       |     |       |     |       |     |       |     |       |
| 7    | 7      | 68.5             | 85.5 | 100  | 112   | 122   | 129 |       |     |       |     |       |     |       |     |       |
| 8    | 13     | 68.5             | 82.5 | 95   | 108   | 118.5 | 128 | 135.5 |     |       |     |       |     |       |     |       |
| 9    | 7      | 69               | 82   | 95   | 109   | 121.5 | 132 | 141.5 | 147 |       |     |       |     |       |     |       |
| 10   | 7      | 70               | 87   | 98   | 109   | 119   | 129 | 135.5 | 142 | 150   |     |       |     |       |     |       |
| 11   | 2      | 68.5             | 82.5 | 99   | 115.5 | 127.5 | 140 | 148.5 | 154 | 157   | 160 |       |     |       |     |       |
| 12   | 1      | 68               | 83   | 93.5 | 705   | 118.5 | 129 | 141   | 146 | 152.5 | 55  | 157   |     |       |     |       |
| 16   | 1      | 73               | 88   | 102  | 118   | 132.5 | 137 | 142.5 | 147 | 152   | 157 | 161   | 162 | 164   | 166 | 169   |
| Mean |        | 69.5             | 83.5 | 96.5 | 109.5 | 120.5 | 129 | 138   | 145 | 150   | 157 | 159.5 | 162 | 164.5 | 166 | 169.5 |
| SD   |        | 3.5              | 4.5  | 5.5  | 5     | 5.5   | 6.5 | 5.5   | 6   | 6     | 3.5 | 2.5   |     |       |     |       |

***M. punctulatus***

| Age  | Number | Age group (year) |      |    |      |     |     |     |     |
|------|--------|------------------|------|----|------|-----|-----|-----|-----|
|      |        | 1                | 2    | 3  | 4    | 5   | 6   | 7   | 8   |
| 1    | 6      | 35               |      |    |      |     |     |     |     |
| 2    | 12     | 37.5             | 54   |    |      |     |     |     |     |
| 3    | 19     | 37               | 56   | 63 |      |     |     |     |     |
| 4    | 17     | 37.5             | 53   | 61 | 79   |     |     |     |     |
| 5    | 9      | 36               | 50   | 57 | 73   | 82  |     |     |     |
| 6    | 1      | 36               | 55   | 65 | 83.5 | 100 | 109 |     |     |
| 8    | 1      | 37.5             | 59   | 66 | 82   | 110 | 115 | 118 | 120 |
| Mean |        | 36.5             | 52.5 | 61 | 77   | 87  | 112 |     |     |
| SD   |        | 2.5              | 3    | 3  | 3.5  | 2.5 | 1.5 |     |     |

**Table S4. Summary of estimated growth parameters of *M. mustelus* and *M. punctulatus* in the south of Sicily. SD= Standard deviation**

| Species                                        | Model           | $L_{\infty}$ (cm±SD) | $L_0$ (cm±SD) | $k$  |
|------------------------------------------------|-----------------|----------------------|---------------|------|
| <i>Mustelus mustelus</i><br>Females (n=61)     | Von Bertalanffy | 209.5 ± 10.5         | 36.5 cm ± 1   | 0.11 |
| <i>Mustelus mustelus</i><br>Males (n=50)       | Von Bertalanffy | 206.5 ± 9            | 35.5 ± 1      | 0.10 |
| <i>Mustelus punctulatus</i><br>Combined (n=62) | Von Bertalanffy | 156 ± 10             | 24± 1         | 0.17 |
